# Supplementary material for: Benchmarking HLA genotyping and clarifying HLA impact on survival in tumor immunotherapy
Source: PubMed Central journal article supplement (PMC8253103; doi:10.1002/1878-0261.12895), 2021-01-24
Supplement: MOL2-15-1764-s013.pdf [file MOL2-15-1764-s013.pdf]

A

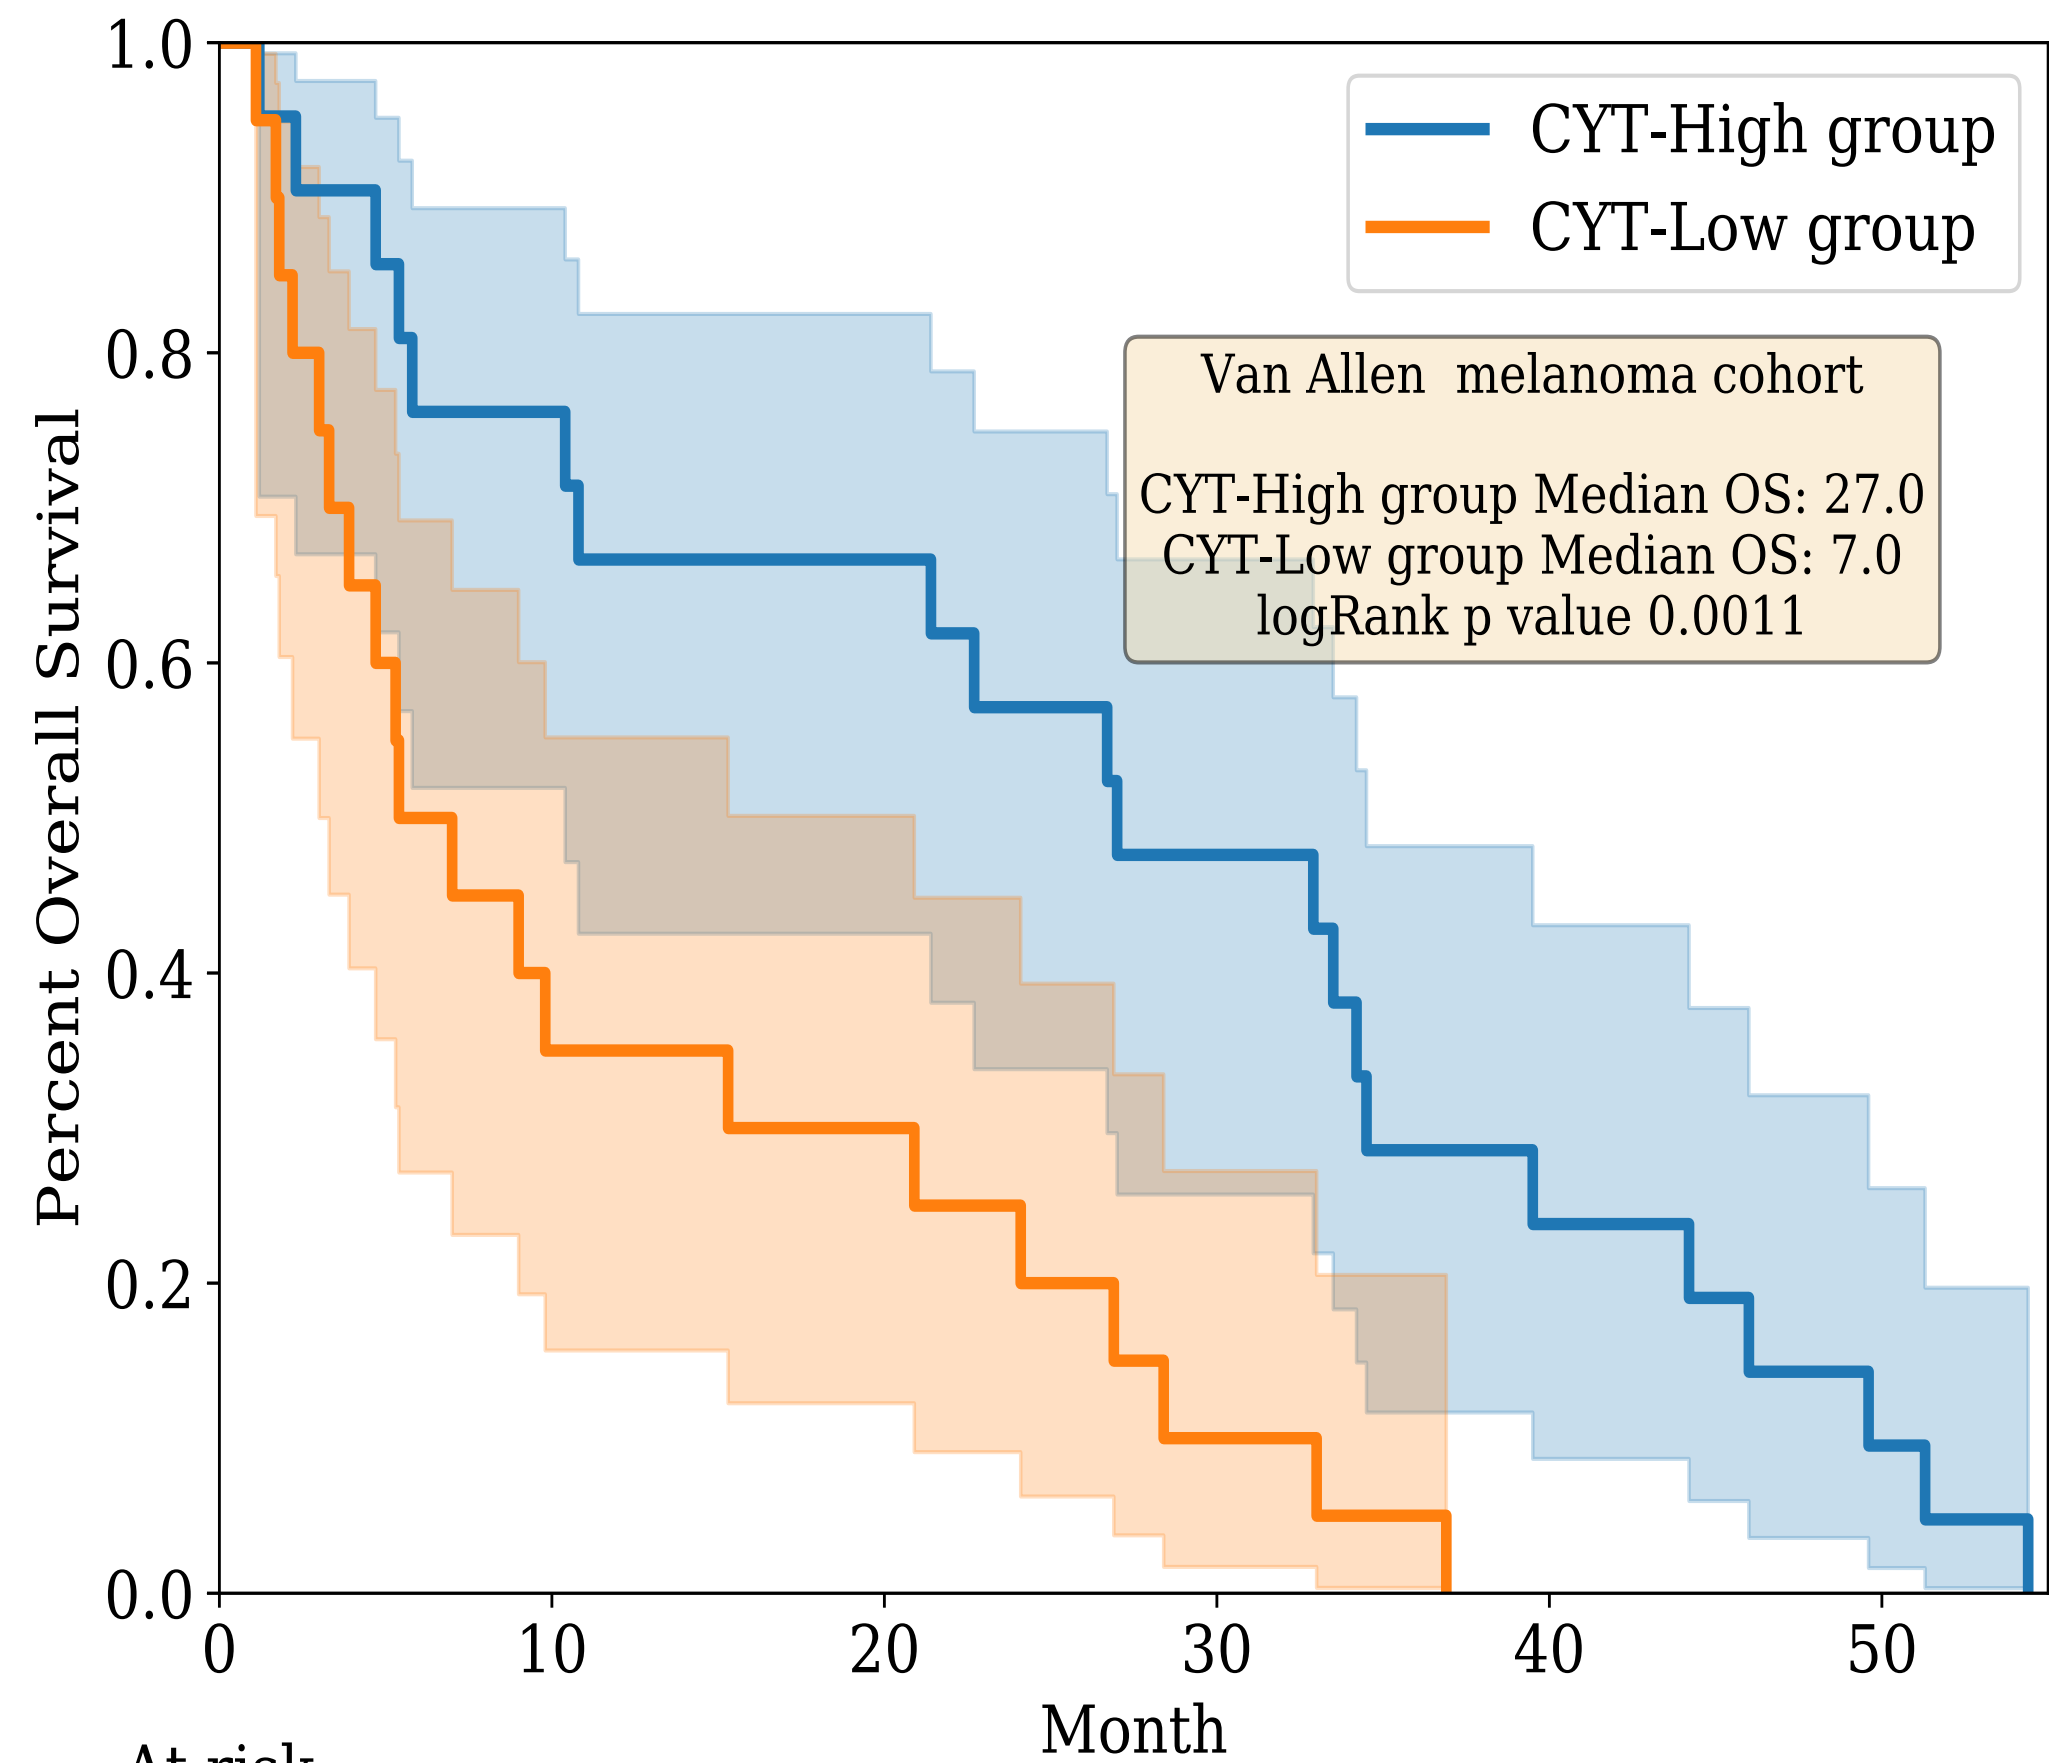

|                | At risk | 0  | 10 | 20 | 30 | 40 | 50 |
|----------------|---------|----|----|----|----|----|----|
| CYT-High group | 21      | 16 | 14 | 10 | 5  | 2  | 0  |
| CYT-Low group  | 20      | 7  | 6  | 2  | 0  | 0  | 0  |

B

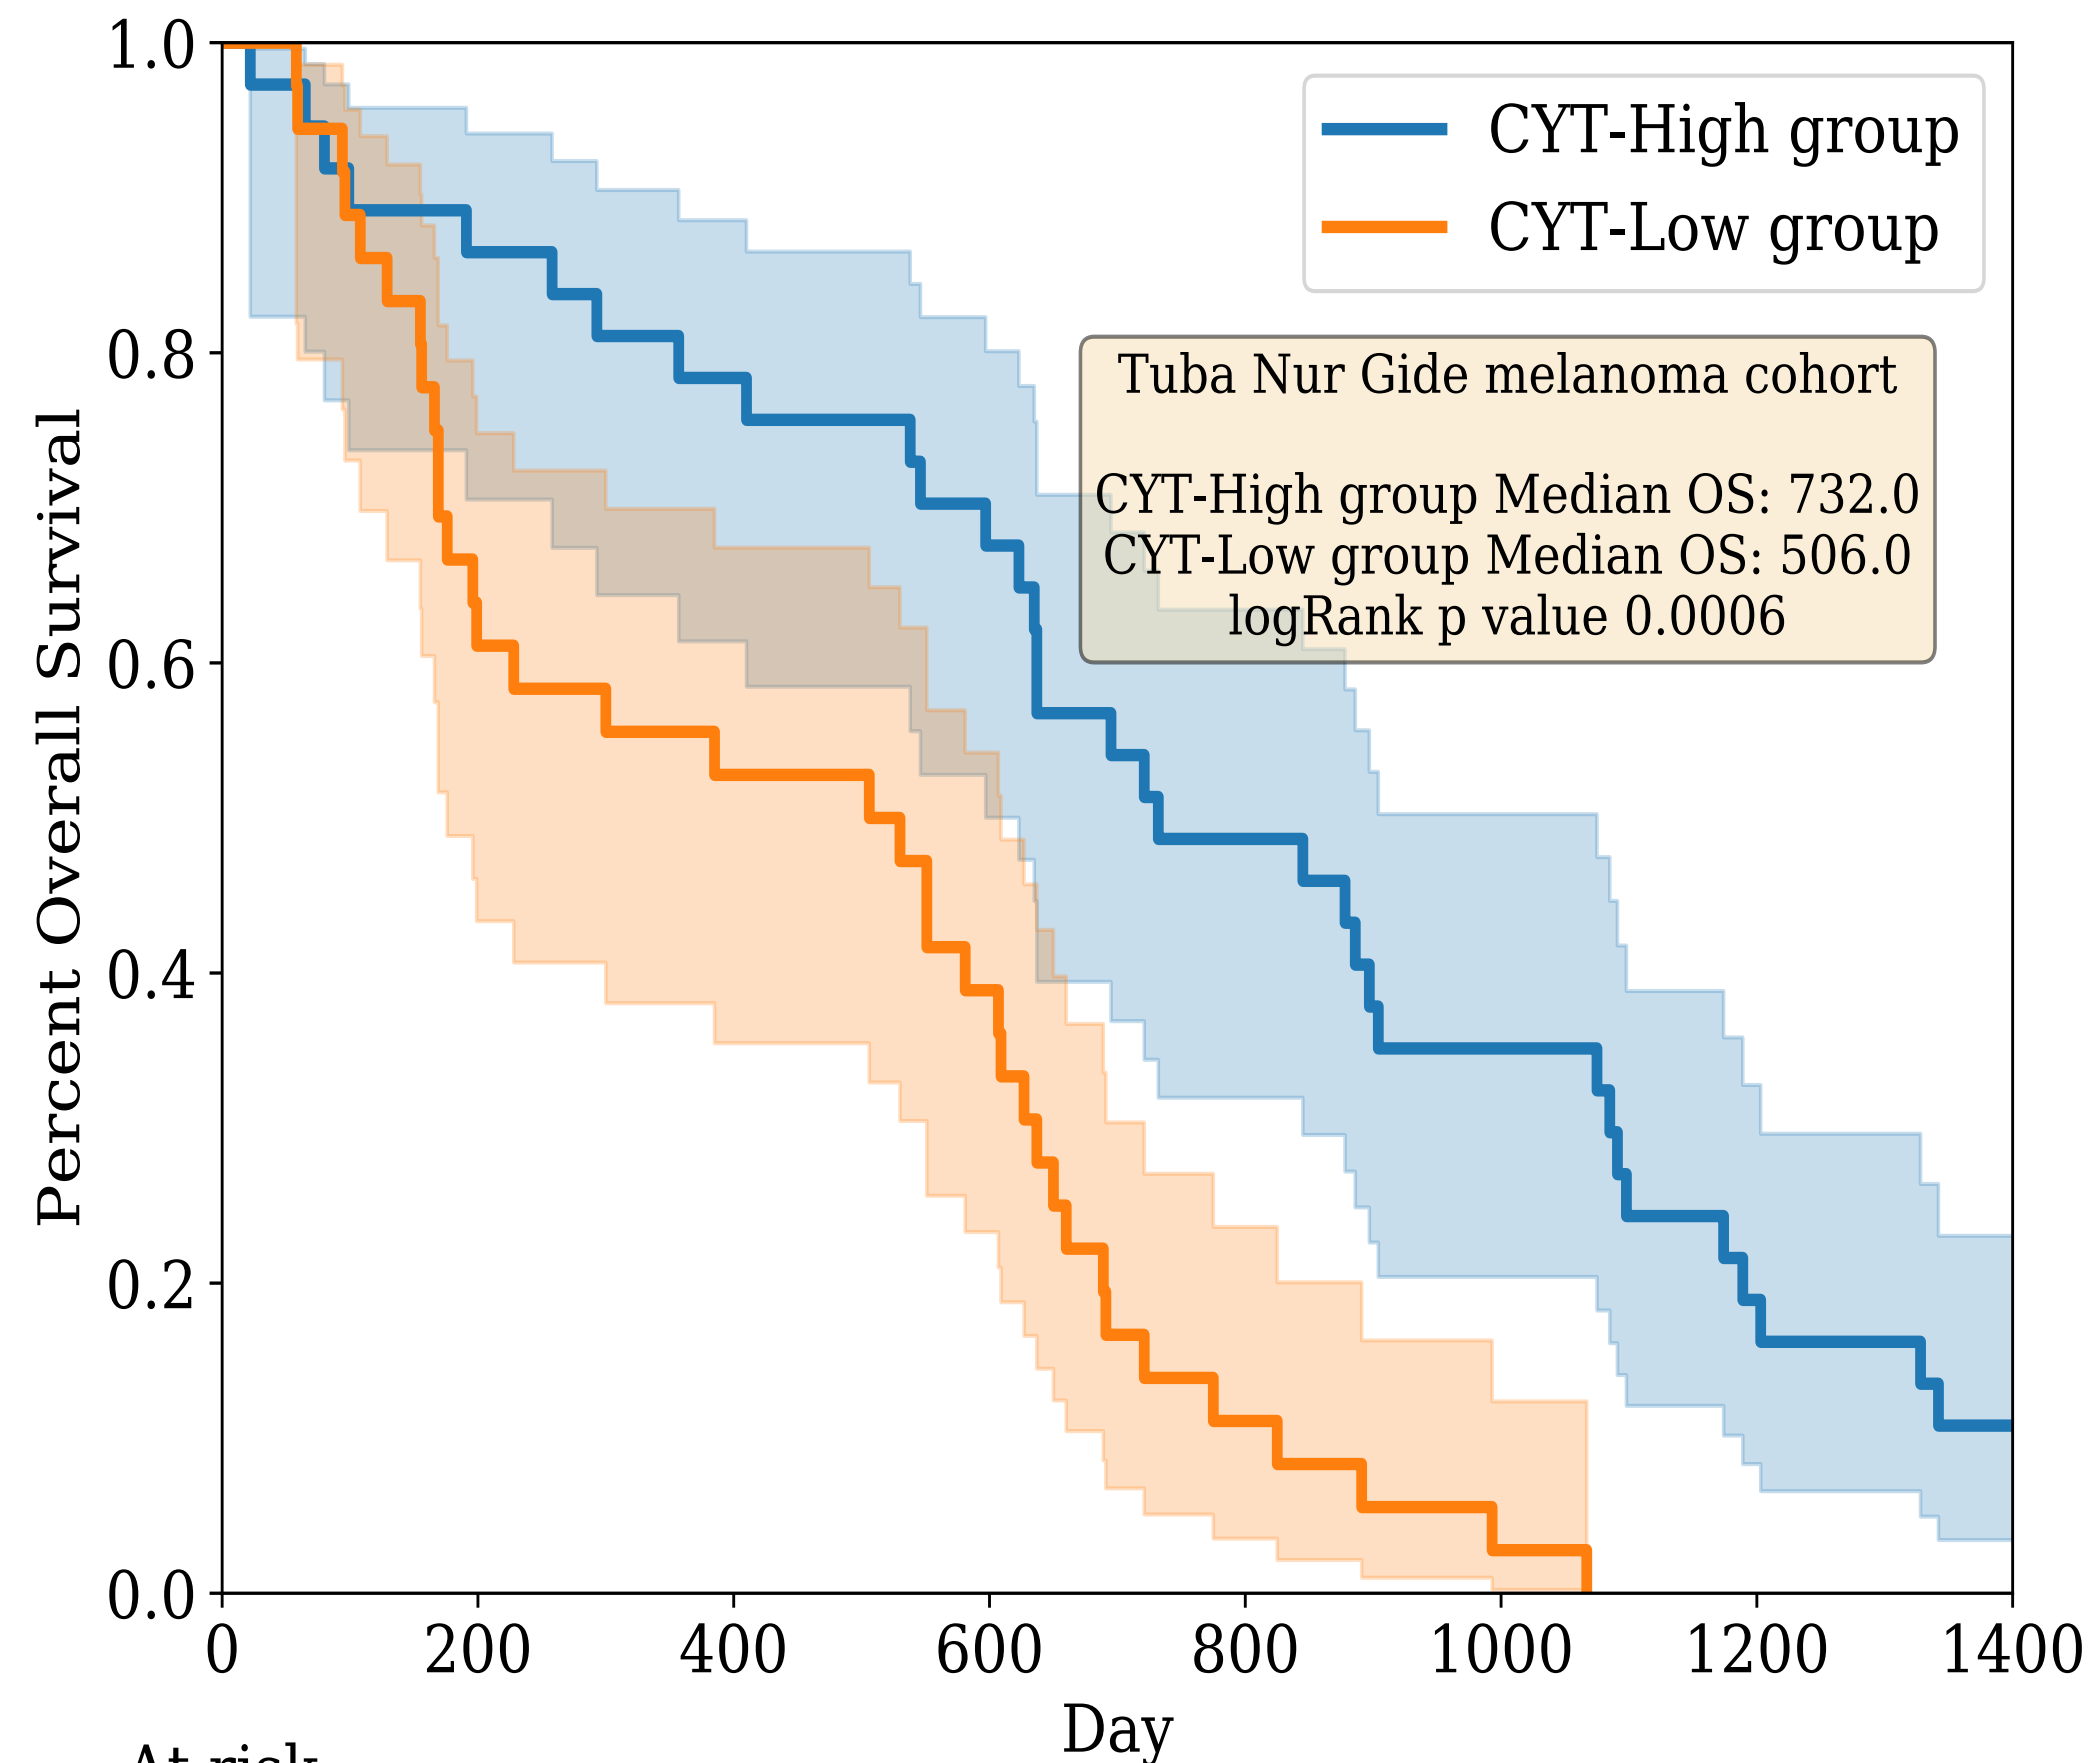

|                | At risk | 0  | 200 | 400 | 600 | 800 | 1000 | 1200 | 1400 |   |
|----------------|---------|----|-----|-----|-----|-----|------|------|------|---|
| CYT-High group | 37      | 32 | 29  | 25  | 18  | 13  | 7    | 4    | 1    | 0 |
| CYT-Low group  | 36      | 22 | 19  | 14  | 4   | 1   | 0    | 0    | 0    | 0 |
