# Supplementary material for: Benchmarking HLA genotyping and clarifying HLA impact on survival in tumor immunotherapy
Source: PubMed Central journal article supplement (PMC8253103; doi:10.1002/1878-0261.12895), 2021-01-24

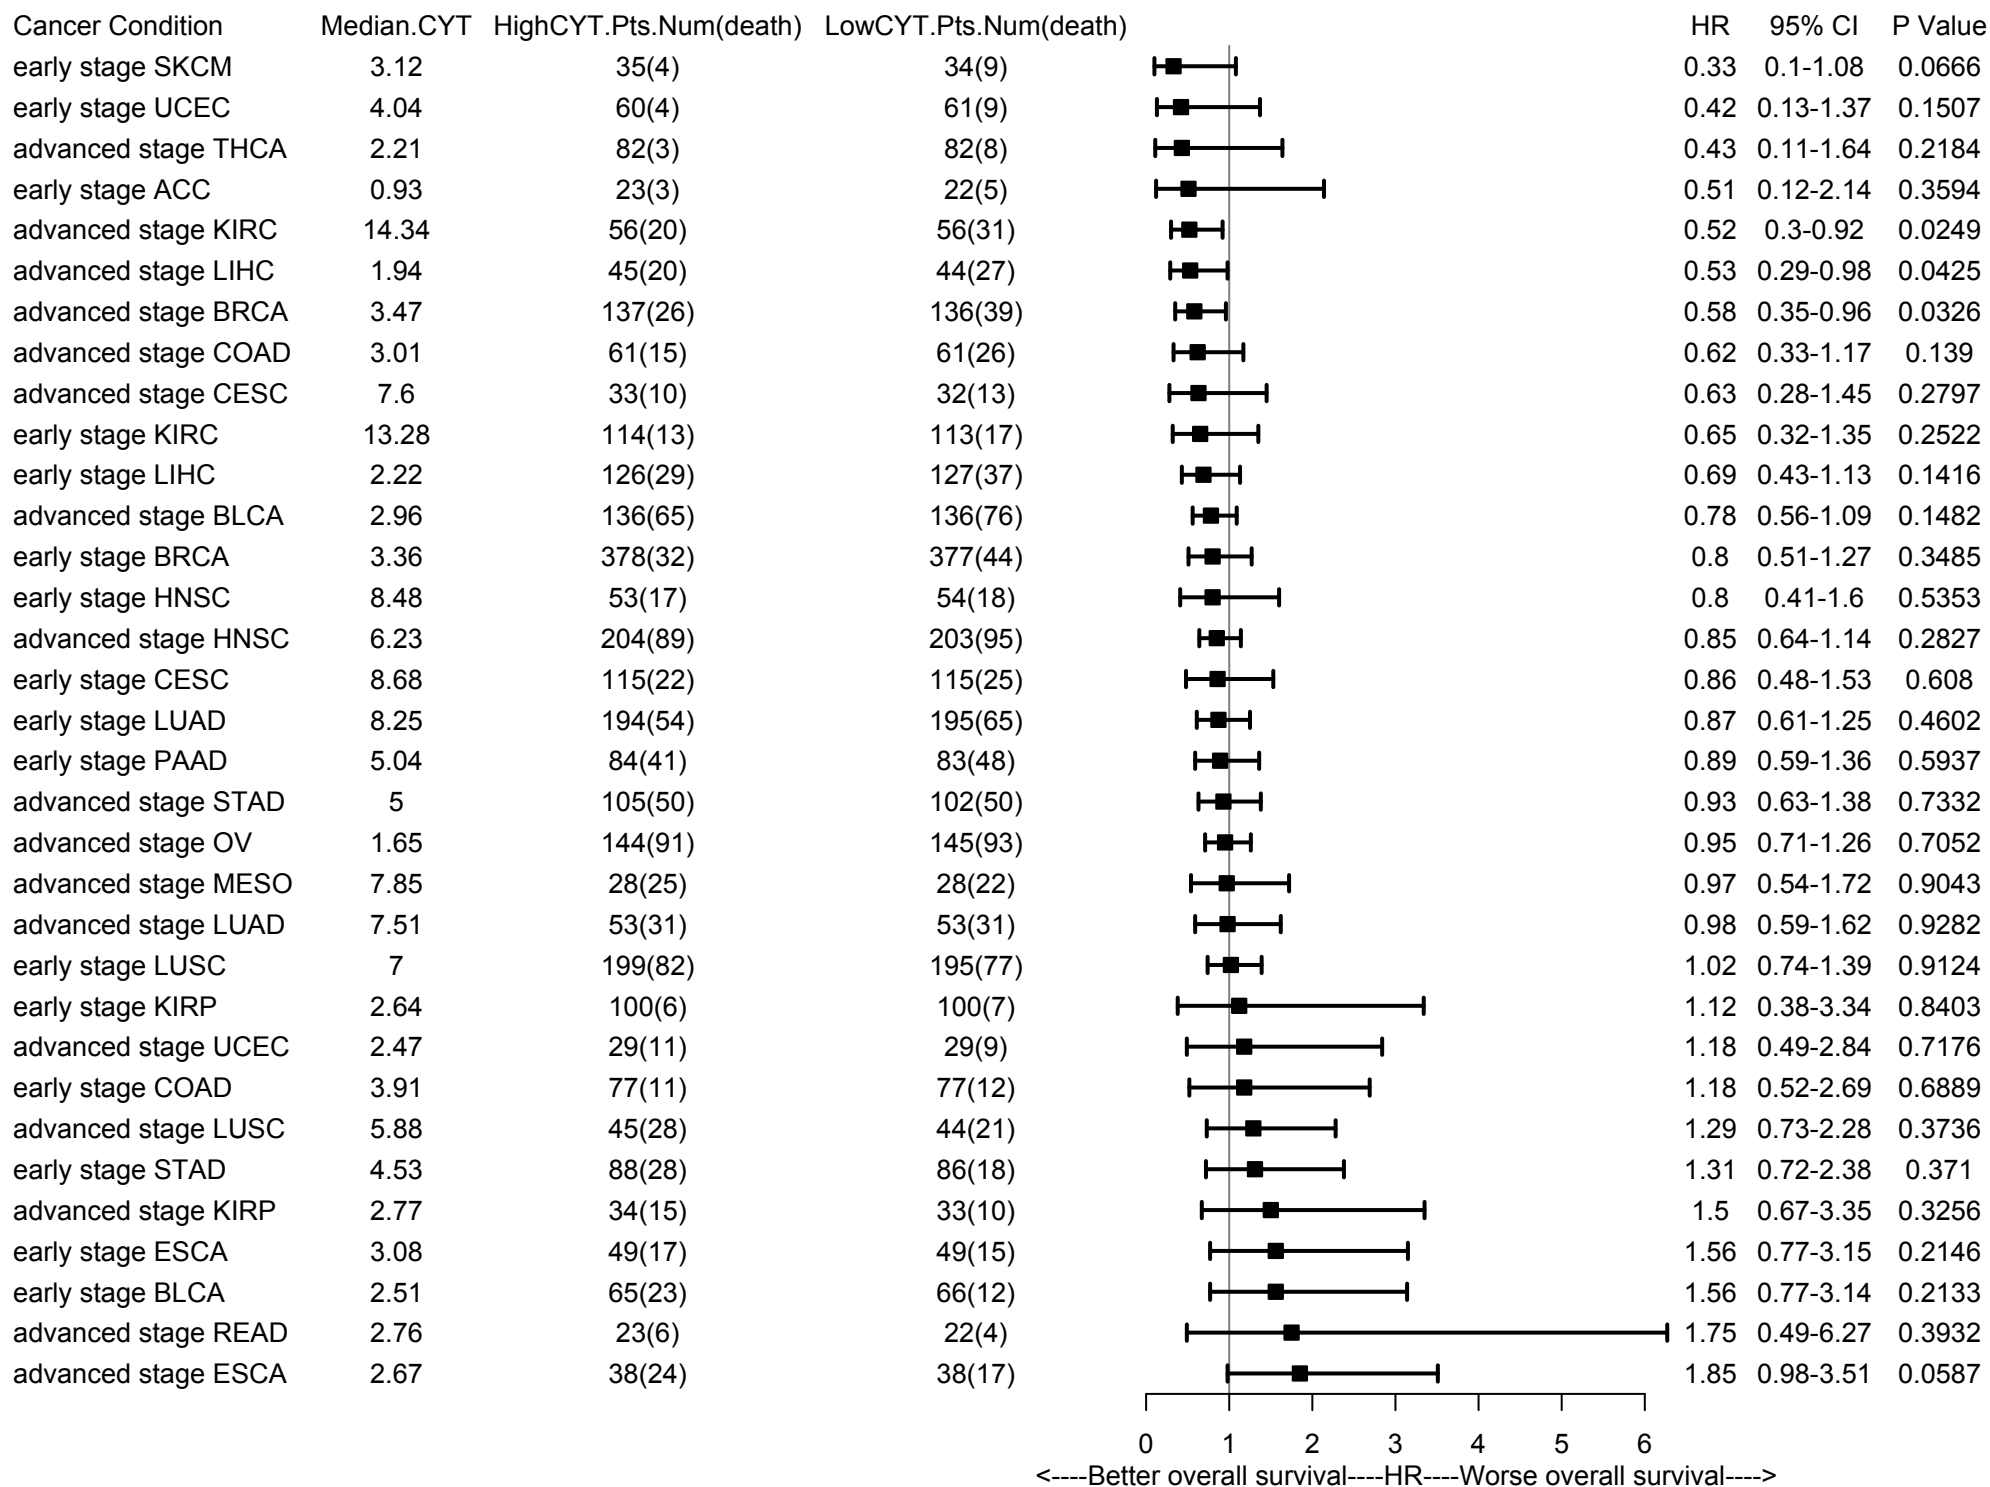

Supplement: MOL2-15-1764-s015.pdf [file MOL2-15-1764-s015.pdf]
